# Supplementary material
Source: Research Square preprint supplement (doi:10.21203/rs.3.rs-9946989/v1)
Supplement: Supplementary file 1 [file 6a07e695c0c53d0fc43597d0.docx]

The Interview guide used in Our study was developed for this study.

Dear participant

This sheet is anonymous and contains an open-ended question.

The Evaluation Team for the newly designed Excellence in Performance Award for Education Development Centers (EDCs) has already briefed you on the award and its objectives, and has provided you with the criteria table. You are now providing documentation to the evaluators. If you agree, please answer the following question based on your experience with the activities, actions, and tasks of EDCs. Please describe your experience about designed performance excellence award in as much detail as possible. We may contact you again to complete the data or clarify any ambiguities in your statements.

Question:

Please share your experience with the main and sub-criteria of the Performance Excellence Award designed for EDCs.

Good luck
